# Supplementary material
Source: Springer Nature journal article supplement (https://www.springermedizin.de/resource/supplementary/12943_2010_794_MOESM9_ESM.pdf/9554852)

**A**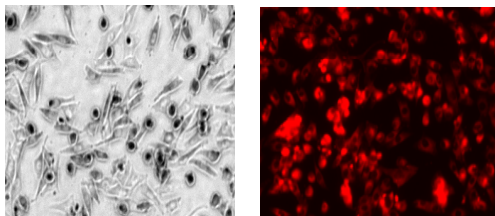**B**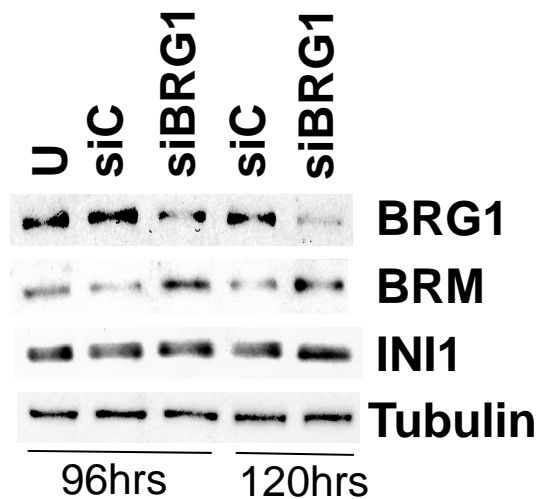**C**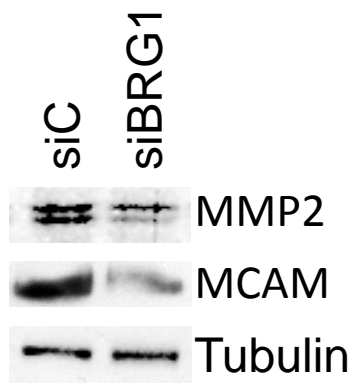**D**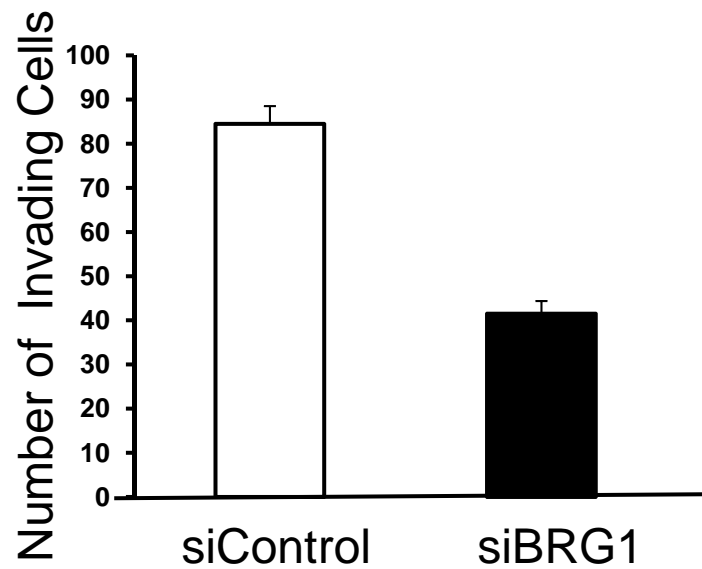

Supplement: MOESM9 [file 9554852]
